# Supplementary material
Source: Springer Nature journal article supplement (https://mijn.bsl.nl/resource/supplementary/13047_2010_340_MOESM4_ESM.pdf/7110542)
Supplement: MOESM4 [file 7110542]

## POST Course Evaluation of FUST (Foot Ulcer Simulation Training Course)

Course Date

Module

Course Code

Site code

 /  / 
 . 
   
  

**YOUR ID CODE:** To allow anonymous matching of responses before and after the course, please enter your ID code using the last 3 letters of your mother's maiden name + your birth order. For example, if your mother's surname was "Jones" and you were born the third child, your code would be "NES3".

ID Code

Code for where you work (see over)

    
  

### Current job description

☐ New graduate podiatrist
 ☐ Podiatrist with 1-3 years' experience
 ☐ Podiatrist with >3 years' experience
 ☐ Other

Please rate out of 5 your level of agreement with the following statements

This course helped me to gain additional knowledge in the management of high-risk feet

This course has improved my skills in managing foot ulcers

This course has helped me to develop additional confidence in my ability to manage a high-risk feet caseload

The information I have learnt in this course will change my diagnosis and management of foot ulcers

1=Not at all - 5=Completely

| 1                        | 2                        | 3                        | 4                        | 5                        |
|--------------------------|--------------------------|--------------------------|--------------------------|--------------------------|
| <input type="checkbox"/> |
| <input type="checkbox"/> |
| <input type="checkbox"/> |
| <input type="checkbox"/> |

For my needs, the standard of the information presented in the course was:

| Too Basic                | Pitched at just the level | Too Advanced             |
|--------------------------|---------------------------|--------------------------|
| <input type="checkbox"/> | <input type="checkbox"/>  | <input type="checkbox"/> |

### The lectures:

1=Not at all - 5=Completely

Prepared me for the practical sessions

Were pitched at the right level

Taught me something I did not know previously

Were relevant to my work

Held my interest

| 1                        | 2                        | 3                        | 4                        | 5                        |
|--------------------------|--------------------------|--------------------------|--------------------------|--------------------------|
| <input type="checkbox"/> |
| <input type="checkbox"/> |
| <input type="checkbox"/> |
| <input type="checkbox"/> |
| <input type="checkbox"/> |

### The Presenters:

1=Not at all - 5=Completely

Were open to questions

Encouraged participation

Modelled the expected behaviour

|                          |                          |                          |                          |                          |
|--------------------------|--------------------------|--------------------------|--------------------------|--------------------------|
| <input type="checkbox"/> |
| <input type="checkbox"/> |
| <input type="checkbox"/> |

### Overall

1=Not at all - 5=Completely

Overall, there was enough variation in the way the course information was presented (e.g. lectures, practical, demonstrations, group discussions etc)

To what extent did the course help you to meet your objectives for attending?

|                          |                          |                          |                          |                          |
|--------------------------|--------------------------|--------------------------|--------------------------|--------------------------|
| <input type="checkbox"/> |
| <input type="checkbox"/> |
| <input type="checkbox"/> |

**Overall, my rating for this course is**  
(1=Unsatisfactory, 2=Satisfactory, 3=Good, 4=Very good, 5=Excellent)

|                          |                          |                          |                          |                          |
|--------------------------|--------------------------|--------------------------|--------------------------|--------------------------|
| <input type="checkbox"/> |
|--------------------------|--------------------------|--------------------------|--------------------------|--------------------------|
